# Supplementary material
Source: PubMed Central journal article supplement (PMC6775869)
Supplement: rccm.201809-1733OC_mendy_data_supplement.pdf [file rccm.201809-1733OC_mendy_data_supplement.pdf]

**Synergistic Association of House Endotoxin Exposure and Ambient  
Air Pollution with Asthma Outcomes**

**On-line Supplement**

Angelico Mendy<sup>1</sup>, Jesse Wilkerson<sup>2</sup>, Päivi M. Salo<sup>3</sup>, Charles H. Weir<sup>4</sup>, Lydia Feinstein<sup>2</sup>, Darryl C.  
Zeldin<sup>3</sup>, and Peter S. Thorne<sup>1</sup>

<sup>1</sup>Department of Occupational and Environmental Health, University of Iowa, Iowa City, Iowa;

<sup>2</sup>Social & Scientific Systems, Inc., Durham, North Carolina;

<sup>3</sup>Division of Intramural Research, National Institute of Environmental Health Sciences, National  
Institutes of Health, Research Triangle Park, North Carolina; and

<sup>4</sup>Office of Emergency Management, U.S. Department of Health and Human Services, Atlanta,  
Georgia

**Corresponding Author:** Peter S. Thorne, PhD  
University of Iowa College of Public Health  
100 CPHB, S341A  
145 N Riverside Dr.  
Iowa City, IA 52242-2207  
Phone: (319) 335-4216  
Email: [peter-thorne@uiowa.edu](mailto:peter-thorne@uiowa.edu)

**Running Head:** Endotoxin, Air Pollution and Asthma Outcomes

**Table E1:** Comparison between the overall NHANES 2005-2006 sample and the participants with data on endotoxin and air pollution.

| Characteristics                        | All Participants N (%) | Participants with data on air pollution N (%) |
|----------------------------------------|------------------------|-----------------------------------------------|
| Age                                    |                        |                                               |
| < 6 years                              | 1,936 (8.3)            | 894 (7.0)                                     |
| 6 – 17 years                           | 2,849 (17.0)           | 2,019 (17.1)                                  |
| ≥ 18 years                             | 5,563 (74.7)           | 3,575 (75.9)                                  |
| Gender                                 |                        |                                               |
| Male                                   | 5,080 (48.9)           | 3,206 (49.0)                                  |
| Female                                 | 5,268 (51.1)           | 3,282 (51.0)                                  |
| Race/ethnicity                         |                        |                                               |
| Non-Hispanic Whites                    | 3,928 (68.4)           | 2,269 (67.7)                                  |
| Non-Hispanic Blacks                    | 2,710 (12.3)           | 1,922 (13.1)                                  |
| Hispanics                              | 2,847 (9.5)            | 1,788 (9.4)                                   |
| Other                                  | 683 (9.7)              | 509 (9.8)                                     |
| BMI                                    |                        |                                               |
| Underweight or normal                  | 4,799 (42.5)           | 3,334 (44.2)                                  |
| Overweight                             | 2,098 (24.6)           | 1,415 (25.4)                                  |
| Obese                                  | 2,052 (25.1)           | 1,425 (27.5)                                  |
| Missing                                | 1,399 (7.8)            | 314 (2.9)                                     |
| Census Region                          |                        |                                               |
| Northeast                              | 1,984 (23.3)           | 865 (15.9)                                    |
| Midwest                                | 1,435 (15.9)           | 1,406 (27.8)                                  |
| South                                  | 3,912 (34.0)           | 2,343 (30.4)                                  |
| West                                   | 3,006 (26.8)           | 1,874 (25.9)                                  |
| Urbanicity                             |                        |                                               |
| Metro                                  | 6,277 (51.7)           | 3,988 (54.4)                                  |
| Non-metro                              | 4,060 (48.3)           | 2,500 (45.6)                                  |
| PIR                                    |                        |                                               |
| ≤ 1.85                                 | 4,653 (30.3)           | 3,114 (32.7)                                  |
| > 1.85                                 | 5,161 (69.7)           | 3,091 (67.3)                                  |
| Smoker in household                    |                        |                                               |
| Yes                                    | 1,759 (18.1)           | 1,261 (20.6)                                  |
| No                                     | 8,477 (81.9)           | 5,181 (79.4)                                  |
| Sensitization to inhalant allergens    |                        |                                               |
| Yes                                    | 3,560 (43.4)           | 2,522 (44.2)                                  |
| No                                     | 3,973 (56.6)           | 2,705 (55.8)                                  |
| Any Wheeze                             |                        |                                               |
| Yes                                    | 1,330 (15.4)           | 899 (15.9)                                    |
| No                                     | 8,486 (84.6)           | 5,586 (84.1)                                  |
| Doctor/ER visits for wheeze            |                        |                                               |
| Yes                                    | 652 (7.0)              | 438 (7.1)                                     |
| No                                     | 9,164 (93.0)           | 6,047 (92.9)                                  |
| Current asthma                         |                        |                                               |
| Yes                                    | 873 (8.7)              | 602 (8.8)                                     |
| No                                     | 8,912 (91.3)           | 5,861 (91.2)                                  |
| ER visits for asthma in past 12 months |                        |                                               |
| Yes                                    | 162 (1.5)              | 114 (1.7)                                     |
| No                                     | 8,734 (98.5)           | 5,740 (98.3)                                  |
| Current asthma or wheeze               |                        |                                               |
| Yes                                    | 1,402 (16.2)           | 940 (16.5)                                    |
| No                                     | 8,392 (83.8)           | 5,530 (83.5)                                  |

Abbreviations: EU, endotoxin unit; mg, milligrams; µg, micrograms; m<sup>3</sup> cubic meters; ppb, parts-per-billion; PM<sub>2.5</sub>, particulate matter ≤ 2.5 µm; O<sub>3</sub>, ozone; NO<sub>2</sub>, nitrogen dioxide; CMAQ, Community Multiscale Air Quality; DS, Downscaler, GM, geometric mean, SE, Standard Error; BMI, Body Mass Index; PIR, Poverty Income ratio.

P-values indicate significance in difference in endotoxin and air pollutant levels by characteristics of participants.

**Table E2:** Odds ratios and 95% confidence intervals for the association of co-exposure to house dust endotoxin and air pollutants with emergency room visits for asthma in the past 12 months in all participants, NHANES 2005-2006

| Exposure Contrast                               | OR (95% CI)                  | AP          |               |
|-------------------------------------------------|------------------------------|-------------|---------------|
|                                                 |                              | Estimate    | P-value       |
| <b>Dust endotoxin / PM<sub>2.5</sub> (CMAQ)</b> |                              |             |               |
| Lower / Lower                                   | 1.00 (reference)             |             |               |
| Lower / Higher                                  | 1.29 (0.67-2.50)             | <b>0.55</b> | <b>0.0055</b> |
| Higher / Lower                                  | <b>1.98 (1.00-3.91) *</b>    |             |               |
| Higher / Higher                                 | <b>5.01 (2.54-9.87) ****</b> |             |               |
| <b>Dust endotoxin / PM<sub>2.5</sub> (DS)</b>   |                              |             |               |
| Lower / Lower                                   | 1.00 (reference)             |             |               |
| Lower / Higher                                  | 1.19 (0.51-2.74)             | -0.03       | 0.95          |
| Higher / Lower                                  | <b>2.65 (1.59-4.42) ***</b>  |             |               |
| Higher / Higher                                 | <b>2.75 (1.03-7.33) *</b>    |             |               |
| <b>Dust endotoxin / O<sub>3</sub> (CMAQ)</b>    |                              |             |               |
| Lower / Lower                                   | 1.00 (reference)             |             |               |
| Lower / Higher                                  | 1.44 (0.66-3.13)             | 0.11        | 0.83          |
| Higher / Lower                                  | <b>2.65 (1.75-4.01) ****</b> |             |               |
| Higher / Higher                                 | <b>3.45 (1.17-10.19) *</b>   |             |               |
| <b>Dust endotoxin / O<sub>3</sub> (DS)</b>      |                              |             |               |
| Lower / Lower                                   | 1.00 (reference)             |             |               |
| Lower / Higher                                  | 0.99 (0.30-3.21)             | -0.16       | 0.83          |
| Higher / Lower                                  | <b>2.62 (1.76-3.91) ****</b> |             |               |
| Higher / Higher                                 | 2.26 (0.88-5.82)             |             |               |
| <b>Dust endotoxin / NO<sub>2</sub> (CMAQ)</b>   |                              |             |               |
| Lower / Lower                                   | 1.00 (reference)             |             |               |
| Lower / Higher                                  | 1.08 (0.45-2.59)             | 0.07        | 0.72          |
| Higher / Lower                                  | <b>2.54 (1.50-4.29) ****</b> |             |               |
| Higher / Higher                                 | <b>2.81 (1.25-6.31) *</b>    |             |               |

\*P < 0.05

\*\*P < 0.01

\*\*\*P < 0.001

\*\*\*\*P < 0.0001

Abbreviations: OR, odds ratio; CI, confidence interval; AP, attributable proportion due to interaction; PM<sub>2.5</sub>, particulate matter ≤ 2.5 μm; O<sub>3</sub>, ozone; NO<sub>2</sub>, nitrogen dioxide; CMAQ, Community Multiscale Air Quality; DS, Downscaler.

Models adjusted for age, gender, race/ethnicity, smoker in household, and PIR, BMI, Census Region, level of urbanization

**Table E3:** Odds ratios and 95% confidence intervals for the association of co-exposure to house dust endotoxin and air pollutants with emergency room visits for asthma in the past 12 months by age groups, NHANES 2005-2006

| Exposure Contrast                               | Children                   |             |                   |                             | Adults   |         |  |
|-------------------------------------------------|----------------------------|-------------|-------------------|-----------------------------|----------|---------|--|
|                                                 | OR (95% CI)                | AP          |                   | OR (95% CI)                 | AP       |         |  |
|                                                 |                            | Estimate    | P-value           |                             | Estimate | P-value |  |
| <b>Dust endotoxin / PM<sub>2.5</sub> (CMAQ)</b> |                            |             |                   |                             |          |         |  |
| Lower / Lower                                   | 1.00 (reference)           |             |                   | 1.00 (reference)            |          |         |  |
| Lower / Higher                                  | 0.51 (0.24-1.10)           | <b>0.80</b> | <b>&lt;0.0001</b> | 1.84 (0.67-5.04)            | 0.45     | 0.16    |  |
| Higher / Lower                                  | 1.23 (0.55-2.77)           |             |                   | 2.39 (0.97-5.89)            |          |         |  |
| Higher / Higher                                 | <b>3.75 (1.27-11.07) *</b> |             |                   | <b>5.91 (1.86-18.77) **</b> |          |         |  |
| <b>Dust endotoxin / PM<sub>2.5</sub> (DS)</b>   |                            |             |                   |                             |          |         |  |
| Lower / Lower                                   | 1.00 (reference)           |             |                   | 1.00 (reference)            |          |         |  |
| Lower / Higher                                  | 1.14 (0.41-3.18)           | 0.39        | 0.27              | 1.27 (0.36-4.50)            | -0.71    | 0.54    |  |
| Higher / Lower                                  | 1.99 (0.86-4.59)           |             |                   | <b>3.07 (1.53-6.16) **</b>  |          |         |  |
| Higher / Higher                                 | <b>3.50 (1.64-7.50) **</b> |             |                   | 1.96 (0.43-9.02)            |          |         |  |
| <b>Dust endotoxin / O<sub>3</sub> (CMAQ)</b>    |                            |             |                   |                             |          |         |  |
| Lower / Lower                                   | 1.00 (reference)           |             |                   | 1.00 (reference)            |          |         |  |
| Lower / Higher                                  | 1.60 (0.72-3.59)           | 0.01        | 0.89              | 1.47 (0.44-4.91)            | 0.19     | 0.80    |  |
| Higher / Lower                                  | <b>2.52 (1.07-5.94) *</b>  |             |                   | <b>2.72 (1.55-4.78) ***</b> |          |         |  |
| Higher / Higher                                 | <b>3.14 (1.15-8.54) *</b>  |             |                   | 3.95 (0.69-22.7)            |          |         |  |
| <b>Dust endotoxin / O<sub>3</sub> (DS)</b>      |                            |             |                   |                             |          |         |  |
| Lower / Lower                                   | 1.00 (reference)           |             |                   | 1.00 (reference)            |          |         |  |
| Lower / Higher                                  | 1.42 (0.64-3.12)           | 0.06        | 0.90              | 0.85 (0.14-5.12)            | -0.14    | 0.90    |  |
| Higher / Lower                                  | <b>2.46 (1.14-5.29) *</b>  |             |                   | <b>2.68 (1.44-5.00) **</b>  |          |         |  |
| Higher / Higher                                 | <b>2.71 (1.24-5.93) *</b>  |             |                   | 2.21 (0.46-10.7)            |          |         |  |
| <b>Dust endotoxin / NO<sub>2</sub> (CMAQ)</b>   |                            |             |                   |                             |          |         |  |
| Lower / Lower                                   | 1.00 (reference)           |             |                   | 1.00 (reference)            |          |         |  |
| Lower / Higher                                  | 0.72 (0.25-2.03)           | <b>0.62</b> | <b>0.011</b>      | 1.36 (0.37-5.08)            | -0.87    | 0.46    |  |
| Higher / Lower                                  | 1.60 (0.56-4.58)           |             |                   | <b>3.19 (1.55-6.58) **</b>  |          |         |  |
| Higher / Higher                                 | <b>3.45 (1.65-7.18) **</b> |             |                   | 1.90 (0.40-9.07)            |          |         |  |

\*P < 0.05      \*\*P < 0.01      \*\*\*P < 0.001      \*\*\*\*P < 0.0001

Abbreviations: OR, odds ratio; AP; CI, confidence interval; attributable proportion due to interaction; PM<sub>2.5</sub>, particulate matter ≤ 2.5 μm; O<sub>3</sub>, ozone; NO<sub>2</sub>, nitrogen dioxide; CMAQ, Community Multiscale Air Quality; DS, Downscaler. Models adjusted for age, gender, race/ethnicity, smoker in household, and PIR, BMI, Census Region, level of urbanization

**Table E4:** Odds ratios and 95% confidence intervals for the association of co-exposure to house dust endotoxin and air pollutants with emergency room visits for asthma in the past 12 months by sensitization to inhalant allergens, NHANES 2005-2006

| Exposure Contrast                               | Sensitized                   |             |              |                            | Not sensitized |         |  |
|-------------------------------------------------|------------------------------|-------------|--------------|----------------------------|----------------|---------|--|
|                                                 | OR (95% CI)                  | AP          |              | OR (95% CI)                | AP             |         |  |
|                                                 |                              | Estimate    | P-value      |                            | Estimate       | P-value |  |
| <b>Dust endotoxin / PM<sub>2.5</sub> (CMAQ)</b> |                              |             |              |                            |                |         |  |
| Lower / Lower                                   | 1.00 (reference)             |             |              | 1.00 (reference)           |                |         |  |
| Lower / Higher                                  | 1.25 (0.48-3.22)             | <b>0.56</b> | <b>0.022</b> | 0.91 (0.26-3.26)           | -0.41          | 0.65    |  |
| Higher / Lower                                  | 1.90 (0.77-4.67)             |             |              | 2.79 (0.87-8.94)           |                |         |  |
| Higher / Higher                                 | <b>4.88 (2.07-11.49) ***</b> |             |              | 1.91 (0.57-6.39)           |                |         |  |
| <b>Dust endotoxin / PM<sub>2.5</sub> (DS)</b>   |                              |             |              |                            |                |         |  |
| Lower / Lower                                   | 1.00 (reference)             |             |              | 1.00 (reference)           |                |         |  |
| Lower / Higher                                  | 1.15 (0.37-3.55)             | -0.63       | 0.41         | 1.60 (0.56-4.56)           | 0.08           | 0.90    |  |
| Higher / Lower                                  | <b>2.90 (1.43-5.85) **</b>   |             |              | 2.74 (0.86-8.73)           |                |         |  |
| Higher / Higher                                 | 1.87 (0.55-6.43)             |             |              | <b>3.62 (1.26-10.46) *</b> |                |         |  |
| <b>Dust endotoxin / O<sub>3</sub> (CMAQ)</b>    |                              |             |              |                            |                |         |  |
| Lower / Lower                                   | 1.00 (reference)             |             |              | 1.00 (reference)           |                |         |  |
| Lower / Higher                                  | 1.90 (0.63-5.70)             | 0.43        | 0.25         | 0.18 (0.02-1.75)           | -0.93          | 0.69    |  |
| Higher / Lower                                  | <b>2.47 (1.20-5.08) *</b>    |             |              | 2.51 (1.10-5.73)           |                |         |  |
| Higher / Higher                                 | <b>5.93 (1.46-24.09) *</b>   |             |              | 0.88 (0.13-5.90)           |                |         |  |
| <b>Dust endotoxin / O<sub>3</sub> (DS)</b>      |                              |             |              |                            |                |         |  |
| Lower / Lower                                   | 1.00 (reference)             |             |              | 1.00 (reference)           |                |         |  |
| Lower / Higher                                  | 1.10 (0.34-3.52)             | -0.15       | 0.87         | 0.27 (0.03-2.55)           | 0.50           | 0.36    |  |
| Higher / Lower                                  | <b>2.68 (1.33-5.40) **</b>   |             |              | 2.26 (1.00-5.12)           |                |         |  |
| Higher / Higher                                 | 2.43 (0.73-8.07)             |             |              | 3.08 (0.58-16.3)           |                |         |  |
| <b>Dust endotoxin / NO<sub>2</sub> (CMAQ)</b>   |                              |             |              |                            |                |         |  |
| Lower / Lower                                   | 1.00 (reference)             |             |              | 1.00 (reference)           |                |         |  |
| Lower / Higher                                  | 1.11 (0.34-3.63)             | -0.20       | 0.64         | 0.62 (0.29-1.35)           | -1.09          | 0.53    |  |
| Higher / Lower                                  | <b>2.72 (1.33-5.54) **</b>   |             |              | 2.79 (0.86-9.00)           |                |         |  |
| Higher / Higher                                 | 2.36 (0.99-5.59)             |             |              | 1.31 (0.58-2.94)           |                |         |  |

\*P < 0.05    \*\*P < 0.01    \*\*\*P < 0.001    \*\*\*\*P < 0.0001

Abbreviations: OR, odds ratio; AP; CI, confidence interval; attributable proportion due to interaction; PM<sub>2.5</sub>, particulate matter ≤ 2.5 μm; O<sub>3</sub>, ozone; NO<sub>2</sub>, nitrogen dioxide; CMAQ, Community Multiscale Air Quality; DS, Downscaler. Models adjusted for age, gender, race/ethnicity, smoker in household, and PIR, BMI, Census Region, level of urbanization.

**Table E5:** Odds ratios and 95% confidence intervals for the association of co-exposure to house dust endotoxin and air pollutants with any wheeze in the past 12 months, NHANES 2005-2006

|                                                 | All participants | Age groups              |                  | Sensitization to inhalant allergens |                         |
|-------------------------------------------------|------------------|-------------------------|------------------|-------------------------------------|-------------------------|
|                                                 |                  | Children                | Adults           | Sensitized                          | Not sensitized          |
| <b>Dust endotoxin / PM<sub>2.5</sub> (CMAQ)</b> |                  |                         |                  |                                     |                         |
| Lower / Lower                                   | 1.00 (reference) | 1.00 (reference)        | 1.00 (reference) | 1.00 (reference)                    | 1.00 (reference)        |
| Lower / Higher                                  | 0.99 (0.74-1.32) | 0.74 (0.54-1.01)        | 1.05 (0.74-1.48) | 0.93 (0.57-1.53)                    | 1.03 (0.75-1.40)        |
| Higher / Lower                                  | 1.09 (0.81-1.47) | 1.18 (0.76-1.83)        | 1.07 (0.76-1.51) | 0.87 (0.47-1.59)                    | 1.43 (0.94-2.19)        |
| Higher / Higher                                 | 1.13 (0.81-1.57) | 1.21 (0.64-2.30)        | 1.08 (0.80-1.46) | 1.36 (0.86-2.17)                    | 0.67 (0.33-1.36)        |
| <b>Dust endotoxin / PM<sub>2.5</sub> (DS)</b>   |                  |                         |                  |                                     |                         |
| Lower / Lower                                   | 1.00 (reference) | 1.00 (reference)        | 1.00 (reference) | 1.00 (reference)                    | 1.00 (reference)        |
| Lower / Higher                                  | 1.03 (0.76-1.40) | 1.18 (0.68-2.04)        | 1.00 (0.73-1.38) | 0.86 (0.45-1.62)                    | 1.09 (0.79-1.49)        |
| Higher / Lower                                  | 1.12 (0.84-1.48) | 1.22 (0.76-1.95)        | 1.12 (0.82-1.52) | 0.94 (0.55-1.62)                    | 1.36 (0.92-2.01)        |
| Higher / Higher                                 | 1.08 (0.67-1.73) | <b>1.76 (1.04-2.97)</b> | 0.83 (0.46-1.51) | 1.04 (0.51-2.12)                    | 0.97 (0.47-1.98)        |
| <b>Dust endotoxin / O<sub>3</sub> (CMAQ)</b>    |                  |                         |                  |                                     |                         |
| Lower / Lower                                   | 1.00 (reference) | 1.00 (reference)        | 1.00 (reference) | 1.00 (reference)                    | 1.00 (reference)        |
| Lower / Higher                                  | 0.94 (0.64-1.37) | 1.11 (0.68-1.82)        | 0.90 (0.59-1.37) | 0.84 (0.46-1.54)                    | 1.10 (0.74-1.64)        |
| Higher / Lower                                  | 1.15 (0.93-1.42) | 1.30 (0.88-1.92)        | 1.13 (0.89-1.43) | 1.06 (0.56-2.00)                    | 1.31 (0.90-1.91)        |
| Higher / Higher                                 | 0.91 (0.50-1.64) | 1.36 (0.76-2.43)        | 0.78 (0.38-1.61) | 0.70 (0.38-1.29)                    | 1.27 (0.51-3.15)        |
| <b>Dust endotoxin / O<sub>3</sub> (DS)</b>      |                  |                         |                  |                                     |                         |
| Lower / Lower                                   | 1.00 (reference) | 1.00 (reference)        | 1.00 (reference) | 1.00 (reference)                    | 1.00 (reference)        |
| Lower / Higher                                  | 0.96 (0.70-1.30) | 0.64 (0.29-1.41)        | 1.04 (0.75-1.45) | 0.77 (0.40-1.48)                    | 1.13 (0.74-1.72)        |
| Higher / Lower                                  | 1.16 (0.93-1.43) | 1.23 (0.85-1.78)        | 1.13 (0.87-1.46) | 0.92 (0.50-1.69)                    | <b>1.48 (1.05-2.10)</b> |
| Higher / Higher                                 | 0.90 (0.45-1.81) | 0.92 (0.53-1.58)        | 0.91 (0.40-2.06) | 0.96 (0.37-2.49)                    | 0.76 (0.31-1.83)        |
| <b>Dust endotoxin / NO<sub>2</sub> (CMAQ)</b>   |                  |                         |                  |                                     |                         |
| Lower / Lower                                   | 1.00 (reference) | 1.00 (reference)        | 1.00 (reference) | 1.00 (reference)                    | 1.00 (reference)        |
| Lower / Higher                                  | 0.97 (0.65-1.46) | 1.04 (0.58-1.88)        | 0.95 (0.62-1.47) | 0.92 (0.49-1.71)                    | 0.96 (0.59-1.57)        |
| Higher / Lower                                  | 1.13 (0.87-1.48) | 1.23 (0.78-1.94)        | 1.13 (0.83-1.54) | 0.95 (0.58-1.57)                    | 1.43 (0.97-2.11)        |
| Higher / Higher                                 | 0.97 (0.66-1.44) | 1.44 (0.75-2.74)        | 0.79 (0.50-1.24) | 1.05 (0.59-1.87)                    | 0.66 (0.38-1.13)        |

Abbreviations: PM<sub>2.5</sub>, particulate matter ≤ 2.5 μm; O<sub>3</sub>, ozone; NO<sub>2</sub>, nitrogen dioxide; CMAQ, Community Multiscale Air Quality; DS, Downscaler. Models adjusted for age, gender, race/ethnicity, smoker in household, and PIR, BMI, Census Region, level of urbanization. **Bold** indicates significant associations.

**Table E6:** Odds ratios and 95% confidence intervals for the association of co-exposure to house dust endotoxin and air pollutants with Doctor or emergency room visits for wheeze in the past 12 months, NHANES 2005-2006

|                                                 | All participants        | Age groups              |                         | Sensitization to inhalant allergens |                         |
|-------------------------------------------------|-------------------------|-------------------------|-------------------------|-------------------------------------|-------------------------|
|                                                 |                         | Children                | Adults                  | Sensitized                          | Not sensitized          |
| <b>Dust endotoxin / PM<sub>2.5</sub> (CMAQ)</b> |                         |                         |                         |                                     |                         |
| Lower / Lower                                   | 1.00 (reference)        | 1.00 (reference)        | 1.00 (reference)        | 1.00 (reference)                    | 1.00 (reference)        |
| Lower / Higher                                  | 1.17 (0.90-1.51)        | 1.06 (0.70-1.60)        | 1.20 (0.86-1.67)        | 0.78 (0.49-1.23)                    | 1.48 (0.96-2.26)        |
| Higher / Lower                                  | <b>1.55 (1.13-2.12)</b> | 1.34 (0.87-2.05)        | <b>1.61 (1.12-2.31)</b> | 1.09 (0.57-2.08)                    | <b>2.11 (1.30-3.42)</b> |
| Higher / Higher                                 | 1.55 (0.99-2.44)        | 1.73 (0.84-3.57)        | 1.29 (0.82-2.00)        | 1.73 (0.96-3.14)                    | 0.64 (0.23-1.76)        |
| <b>Dust endotoxin / PM<sub>2.5</sub> (DS)</b>   |                         |                         |                         |                                     |                         |
| Lower / Lower                                   | 1.00 (reference)        | 1.00 (reference)        | 1.00 (reference)        | 1.00 (reference)                    | 1.00 (reference)        |
| Lower / Higher                                  | 1.29 (0.92-1.79)        | 1.06 (0.61-1.83)        | 1.37 (0.89-2.10)        | 1.29 (0.75-2.19)                    | 1.20 (0.75-1.93)        |
| Higher / Lower                                  | <b>1.59 (1.20-2.11)</b> | 1.33 (0.83-2.14)        | <b>1.66 (1.21-2.26)</b> | 1.38 (0.83-2.29)                    | <b>1.74 (1.05-2.88)</b> |
| Higher / Higher                                 | <b>1.63 (1.01-2.63)</b> | 1.81 (0.84-3.91)        | 1.37 (0.61-3.05)        | 1.66 (0.77-3.58)                    | 1.64 (0.59-4.53)        |
| <b>Dust endotoxin / O<sub>3</sub> (CMAQ)</b>    |                         |                         |                         |                                     |                         |
| Lower / Lower                                   | 1.00 (reference)        | 1.00 (reference)        | 1.00 (reference)        | 1.00 (reference)                    | 1.00 (reference)        |
| Lower / Higher                                  | 0.67 (0.35-1.28)        | 1.14 (0.65-2.00)        | 0.57 (0.28-1.16)        | 0.76 (0.36-1.64)                    | 0.62 (0.26-1.51)        |
| Higher / Lower                                  | <b>1.38 (1.10-1.73)</b> | 1.40 (0.91-2.15)        | <b>1.33 (1.06-1.67)</b> | 1.33 (0.77-2.31)                    | 1.39 (0.87-2.22)        |
| Higher / Higher                                 | 1.24 (0.94-1.64)        | <b>1.69 (1.01-2.86)</b> | 1.09 (0.73-1.63)        | 1.01 (0.51-1.99)                    | 1.68 (0.94-3.00)        |
| <b>Dust endotoxin / O<sub>3</sub> (DS)</b>      |                         |                         |                         |                                     |                         |
| Lower / Lower                                   | 1.00 (reference)        | 1.00 (reference)        | 1.00 (reference)        | 1.00 (reference)                    | 1.00 (reference)        |
| Lower / Higher                                  | 0.75 (0.43-1.32)        | 0.94 (0.40-2.24)        | 0.71 (0.38-1.33)        | 1.08 (0.37-3.21)                    | 0.56 (0.30-1.04)        |
| Higher / Lower                                  | <b>1.38 (1.11-1.70)</b> | 1.43 (0.98-2.09)        | <b>1.29 (1.01-1.66)</b> | 1.30 (0.75-2.27)                    | 1.40 (0.87-2.27)        |
| Higher / Higher                                 | 1.47 (0.74-2.92)        | 1.31 (0.68-2.51)        | 1.60 (0.75-3.44)        | 1.59 (0.56-4.47)                    | 1.65 (0.84-3.24)        |
| <b>Dust endotoxin / NO<sub>2</sub> (CMAQ)</b>   |                         |                         |                         |                                     |                         |
| Lower / Lower                                   | 1.00 (reference)        | 1.00 (reference)        | 1.00 (reference)        | 1.00 (reference)                    | 1.00 (reference)        |
| Lower / Higher                                  | 1.14 (0.76-1.71)        | 1.10 (0.54-2.21)        | 1.16 (0.71-1.89)        | 0.86 (0.50-1.48)                    | 1.28 (0.70-2.34)        |
| Higher / Lower                                  | 1.70 (1.26-2.30)        | 1.33 (0.80-2.22)        | <b>1.83 (1.35-2.49)</b> | 1.35 (0.83-2.22)                    | <b>2.13 (1.19-3.82)</b> |
| Higher / Higher                                 | 1.10 (0.62-1.97)        | 1.79 (0.84-3.78)        | 0.64 (0.26-1.58)        | 1.11 (0.55-2.23)                    | 0.59 (0.27-1.31)        |

Abbreviations: PM<sub>2.5</sub>, particulate matter ≤ 2.5 μm; O<sub>3</sub>, ozone; NO<sub>2</sub>, nitrogen dioxide; CMAQ, Community Multiscale Air Quality; DS, Downscaler. Models adjusted for age, gender, race/ethnicity, smoker in household, and PIR, BMI, Census Region, level of urbanization. **Bold** indicates significant associations.

**Table E7:** Odds ratios and 95% confidence intervals for the association of co-exposure to house dust endotoxin and air pollutants with current asthma, NHANES 2005-2006

|                                                 | All participants | Age groups       |                         | Sensitization to inhalant allergens |                         |
|-------------------------------------------------|------------------|------------------|-------------------------|-------------------------------------|-------------------------|
|                                                 |                  | Children         | Adults                  | Sensitized                          | Not sensitized          |
| <b>Dust endotoxin / PM<sub>2.5</sub> (CMAQ)</b> |                  |                  |                         |                                     |                         |
| Lower / Lower                                   | 1.00 (reference) | 1.00 (reference) | 1.00 (reference)        | 1.00 (reference)                    | 1.00 (reference)        |
| Lower / Higher                                  | 1.07 (0.72-1.59) | 0.86 (0.65-1.14) | 1.16 (0.71-1.89)        | 1.03 (0.58-1.83)                    | 1.12 (0.75-1.69)        |
| Higher / Lower                                  | 1.16 (0.81-1.66) | 1.26 (0.71-2.25) | 1.09 (0.79-1.49)        | 1.51 (0.84-2.73)                    | 1.02 (0.68-1.52)        |
| Higher / Higher                                 | 1.66 (0.97-2.86) | 1.67 (0.91-3.04) | 1.66 (0.81-3.41)        | 1.86 (0.96-3.61)                    | 1.06 (0.39-2.86)        |
| <b>Dust endotoxin / PM<sub>2.5</sub> (DS)</b>   |                  |                  |                         |                                     |                         |
| Lower / Lower                                   | 1.00 (reference) | 1.00 (reference) | 1.00 (reference)        | 1.00 (reference)                    | 1.00 (reference)        |
| Lower / Higher                                  | 1.09 (0.80-1.48) | 1.04 (0.65-1.68) | 1.10 (0.83-1.47)        | 1.39 (0.81-2.38)                    | 0.69 (0.41-1.17)        |
| Higher / Lower                                  | 1.33 (0.94-1.89) | 1.47 (0.83-2.59) | 1.26 (0.90-1.76)        | 1.73 (0.97-3.10)                    | 1.05 (0.70-1.59)        |
| Higher / Higher                                 | 1.07 (0.80-1.43) | 1.28 (0.72-2.28) | 0.96 (0.75-1.23)        | <b>1.73 (1.22-2.45)</b>             | <b>0.46 (0.29-0.73)</b> |
| <b>Dust endotoxin / O<sub>3</sub> (CMAQ)</b>    |                  |                  |                         |                                     |                         |
| Lower / Lower                                   | 1.00 (reference) | 1.00 (reference) | 1.00 (reference)        | 1.00 (reference)                    | 1.00 (reference)        |
| Lower / Higher                                  | 0.88 (0.45-1.71) | 1.06 (0.60-1.87) | 0.84 (0.40-1.76)        | 1.02 (0.41-2.52)                    | 0.73 (0.38-1.39)        |
| Higher / Lower                                  | 1.16 (0.84-1.60) | 1.54 (0.87-2.71) | 0.98 (0.71-1.34)        | 1.35 (0.86-2.12)                    | 1.00 (0.61-1.65)        |
| Higher / Higher                                 | 1.34 (0.76-2.37) | 1.18 (0.57-2.45) | 1.47 (0.68-3.16)        | <b>2.34 (1.18-4.65)</b>             | 0.69 (0.31-1.54)        |
| <b>Dust endotoxin / O<sub>3</sub> (DS)</b>      |                  |                  |                         |                                     |                         |
| Lower / Lower                                   | 1.00 (reference) | 1.00 (reference) | 1.00 (reference)        | 1.00 (reference)                    | 1.00 (reference)        |
| Lower / Higher                                  | 0.63 (0.43-0.91) | 0.84 (0.41-1.73) | <b>0.58 (0.36-0.94)</b> | <b>0.41 (0.19-0.86)</b>             | 0.88 (0.51-1.49)        |
| Higher / Lower                                  | 1.17 (0.86-1.59) | 1.43 (0.84-2.44) | 1.04 (0.77-1.40)        | 1.20 (0.80-1.78)                    | 1.22 (0.79-1.90)        |
| Higher / Higher                                 | 1.00 (0.60-1.68) | 1.14 (0.61-2.12) | 0.99 (0.52-1.85)        | 1.50 (0.88-2.54)                    | 0.31 (0.09-1.14)        |
| <b>Dust endotoxin / NO<sub>2</sub> (CMAQ)</b>   |                  |                  |                         |                                     |                         |
| Lower / Lower                                   | 1.00 (reference) | 1.00 (reference) | 1.00 (reference)        | 1.00 (reference)                    | 1.00 (reference)        |
| Lower / Higher                                  | 1.04 (0.69-1.57) | 1.15 (0.74-1.80) | 1.05 (0.64-1.73)        | 1.14 (0.58-2.25)                    | 0.90 (0.52-1.54)        |
| Higher / Lower                                  | 1.22 (0.87-1.73) | 1.47 (0.80-2.70) | 1.10 (0.80-1.51)        | 1.57 (0.96-2.58)                    | 1.05 (0.66-1.67)        |
| Higher / Higher                                 | 1.42 (0.98-2.05) | 1.45 (0.94-2.25) | 1.46 (0.85-2.52)        | <b>1.86 (1.17-2.97)</b>             | 0.75 (0.35-1.58)        |

Abbreviations: PM<sub>2.5</sub>, particulate matter ≤ 2.5 μm; O<sub>3</sub>, ozone; NO<sub>2</sub>, nitrogen dioxide; CMAQ, Community Multiscale Air Quality; DS, Downscaler. Models adjusted for age, gender, race/ethnicity, smoker in household, and PIR, BMI, Census Region, level of urbanization. **Bold** indicates significant associations.



**Table E8:** Odds ratios and 95% confidence intervals for the association of co-exposure to house dust endotoxin and air pollutants with current asthma or wheeze, NHANES 2005-2006

|                                                 | All participants | Age groups              |                  | Sensitization to inhalant allergens |                         |
|-------------------------------------------------|------------------|-------------------------|------------------|-------------------------------------|-------------------------|
|                                                 |                  | Children                | Adults           | Sensitized                          | Not sensitized          |
| <b>Dust endotoxin / PM<sub>2.5</sub> (CMAQ)</b> |                  |                         |                  |                                     |                         |
| Lower / Lower                                   | 1.00 (reference) | 1.00 (reference)        | 1.00 (reference) | 1.00 (reference)                    | 1.00 (reference)        |
| Lower / Higher                                  | 1.01 (0.77-1.33) | 0.77 (0.54-1.10)        | 1.07 (0.77-1.50) | 1.02 (0.64-1.61)                    | 0.98 (0.71-1.36)        |
| Higher / Lower                                  | 1.09 (0.83-1.42) | 1.12 (0.73-1.73)        | 1.08 (0.80-1.46) | 0.92 (0.51-1.66)                    | 1.35 (0.91-1.98)        |
| Higher / Higher                                 | 1.21 (0.89-1.64) | 1.28 (0.74-2.22)        | 1.16 (0.84-1.61) | <b>1.60 (1.05-2.45)</b>             | 0.64 (0.33-1.26)        |
| <b>Dust endotoxin / PM<sub>2.5</sub> (DS)</b>   |                  |                         |                  |                                     |                         |
| Lower / Lower                                   | 1.00 (reference) | 1.00 (reference)        | 1.00 (reference) | 1.00 (reference)                    | 1.00 (reference)        |
| Lower / Higher                                  | 1.05 (0.79-1.41) | 1.26 (0.73-2.19)        | 1.02 (0.75-1.37) | 0.90 (0.49-1.63)                    | 1.08 (0.81-1.45)        |
| Higher / Lower                                  | 1.14 (0.89-1.45) | 1.20 (0.77-1.88)        | 1.15 (0.88-1.49) | 1.04 (0.62-1.72)                    | 1.29 (0.90-1.85)        |
| Higher / Higher                                 | 1.07 (0.68-1.68) | <b>1.72 (1.07-2.76)</b> | 0.82 (0.46-1.49) | 1.05 (0.53-2.10)                    | 0.93 (0.45-1.88)        |
| <b>Dust endotoxin / O<sub>3</sub> (CMAQ)</b>    |                  |                         |                  |                                     |                         |
| Lower / Lower                                   | 1.00 (reference) | 1.00 (reference)        | 1.00 (reference) | 1.00 (reference)                    | 1.00 (reference)        |
| Lower / Higher                                  | 0.93 (0.64-1.35) | 1.02 (0.61-1.70)        | 0.91 (0.61-1.35) | 0.85 (0.46-1.57)                    | 1.08 (0.74-1.58)        |
| Higher / Lower                                  | 1.14 (0.92-1.40) | 1.23 (0.83-1.83)        | 1.12 (0.89-1.41) | 1.10 (0.59-2.03)                    | 1.25 (0.88-1.77)        |
| Higher / Higher                                 | 0.95 (0.59-1.54) | 1.25 (0.72-2.18)        | 0.87 (0.51-1.47) | 0.83 (0.50-1.39)                    | 1.19 (0.50-2.86)        |
| <b>Dust endotoxin / O<sub>3</sub> (DS)</b>      |                  |                         |                  |                                     |                         |
| Lower / Lower                                   | 1.00 (reference) | 1.00 (reference)        | 1.00 (reference) | 1.00 (reference)                    | 1.00 (reference)        |
| Lower / Higher                                  | 0.96 (0.68-1.33) | 0.66 (0.33-1.34)        | 1.04 (0.73-1.48) | 0.76 (0.39-1.51)                    | 1.16 (0.78-1.74)        |
| Higher / Lower                                  | 1.15 (0.92-1.43) | 1.20 (0.82-1.77)        | 1.12 (0.87-1.45) | 0.95 (0.52-1.73)                    | <b>1.42 (1.02-1.97)</b> |
| Higher / Higher                                 | 0.95 (0.53-1.70) | 0.87 (0.49-1.52)        | 1.01 (0.52-1.96) | 1.10 (0.53-2.29)                    | 0.73 (0.32-1.69)        |
| <b>Dust endotoxin / NO<sub>2</sub> (CMAQ)</b>   |                  |                         |                  |                                     |                         |
| Lower / Lower                                   | 1.00 (reference) | 1.00 (reference)        | 1.00 (reference) | 1.00 (reference)                    | 1.00 (reference)        |
| Lower / Higher                                  | 0.99 (0.68-1.45) | 1.14 (0.68-1.92)        | 0.96 (0.63-1.47) | 0.98 (0.54-1.77)                    | 0.93 (0.59-1.46)        |
| Higher / Lower                                  | 1.14 (0.90-1.44) | 1.21 (0.78-1.89)        | 1.14 (0.87-1.51) | 1.03 (0.64-1.68)                    | 1.35 (0.95-1.93)        |
| Higher / Higher                                 | 1.01 (0.69-1.47) | 1.45 (0.81-2.58)        | 0.83 (0.52-1.35) | 1.15 (0.66-1.97)                    | 0.61 (0.37-1.03)        |

Abbreviations: PM<sub>2.5</sub>, particulate matter ≤ 2.5 μm; O<sub>3</sub>, ozone; NO<sub>2</sub>, nitrogen dioxide; CMAQ, Community Multiscale Air Quality; DS, Downscaler. Models adjusted for age, gender, race/ethnicity, smoker in household, and PIR, BMI, Census Region, level of urbanization. **Bold** indicates significant associations.

**Table E9:** Odds ratios and 95% confidence intervals for the association of co-exposure to house dust endotoxin and air pollutants with sensitization to inhalant allergens, NHANES 2005-2006

|                                                        | All participants        | Age groups       |                           |
|--------------------------------------------------------|-------------------------|------------------|---------------------------|
|                                                        |                         | Children         | Adults                    |
| <b><u>Dust endotoxin / PM<sub>2.5</sub> (CMAQ)</u></b> |                         |                  |                           |
| Lower / Lower                                          | 1.00 (reference)        | 1.00 (reference) | 1.00 (reference)          |
| Lower / Higher                                         | <b>1.18 (1.05-1.34)</b> | 1.04 (0.63-1.72) | <b>1.19 (1.02 (1.38))</b> |
| Higher / Lower                                         | 0.90 (0.74-1.09)        | 0.92 (0.64-1.31) | 0.94 (0.74-1.20)          |
| Higher / Higher                                        | 1.27 (0.94-1.71)        | 1.02 (0.65-1.59) | 1.40 (0.93-2.10)          |
| <b><u>Dust endotoxin / PM<sub>2.5</sub> (DS)</u></b>   |                         |                  |                           |
| Lower / Lower                                          | 1.00 (reference)        | 1.00 (reference) | 1.00 (reference)          |
| Lower / Higher                                         | 1.09 (0.93-1.28)        | 0.92 (0.64-1.33) | 1.11 (0.93-1.33)          |
| Higher / Lower                                         | 0.99 (0.85-1.16)        | 1.00 (0.76-1.31) | 1.04 (0.84-1.30)          |
| Higher / Higher                                        | 0.84 (0.57-1.26)        | 0.64 (0.40-1.04) | 0.95 (0.60-1.50)          |
| <b><u>Dust endotoxin / O<sub>3</sub> (CMAQ)</u></b>    |                         |                  |                           |
| Lower / Lower                                          | 1.00 (reference)        | 1.00 (reference) | 1.00 (reference)          |
| Lower / Higher                                         | 0.83 (0.75-0.91)        | 0.80 (0.61-1.05) | <b>0.82 (0.73-0.93)</b>   |
| Higher / Lower                                         | 0.89 (0.76-1.04)        | 0.97 (0.71-1.32) | 0.91 (0.74-1.13)          |
| Higher / Higher                                        | 0.88 (0.65-1.19)        | 0.67 (0.44-1.01) | 1.02 (0.74-1.40)          |
| <b><u>Dust endotoxin / O<sub>3</sub> (DS)</u></b>      |                         |                  |                           |
| Lower / Lower                                          | 1.00 (reference)        | 1.00 (reference) | 1.00 (reference)          |
| Lower / Higher                                         | 0.98 (0.78-1.23)        | 0.88 (0.56-1.39) | 1.01 (0.79-1.29)          |
| Higher / Lower                                         | 0.93 (0.79-1.09)        | 0.99 (0.71-1.39) | 0.95 (0.78-1.17)          |
| Higher / Higher                                        | 0.95 (0.73-1.23)        | 0.68 (0.36-1.28) | 1.15 (0.89-1.49)          |
| <b><u>Dust endotoxin / NO<sub>2</sub> (CMAQ)</u></b>   |                         |                  |                           |
| Lower / Lower                                          | 1.00 (reference)        | 1.00 (reference) | 1.00 (reference)          |
| Lower / Higher                                         | 1.28 (0.99-1.65)        | 1.00 (0.65-1.55) | 1.31 (1.00-1.71)          |
| Higher / Lower                                         | 0.95 (0.80-1.14)        | 0.91 (0.68-1.21) | 1.02 (0.81-1.28)          |
| Higher / Higher                                        | 1.15 (0.79-1.66)        | 1.00 (0.57-1.74) | 1.22 (0.80-1.87)          |

Abbreviations: PM<sub>2.5</sub>, particulate matter ≤ 2.5 μm; O<sub>3</sub>, ozone; NO<sub>2</sub>, nitrogen dioxide; CMAQ, Community Multiscale Air Quality; DS, Downscaler. Models adjusted for age, gender, race/ethnicity, smoker in household, and PIR, BMI, Census Region, level of urbanization. **Bold** indicates significant associations.
